# Supplementary material
Source: Springer Nature journal article supplement (https://www.springermedizin.de/resource/supplementary/12936_2009_1167_MOESM2_ESM.pdf/9550036)
Supplement: MOESM2 [file 9550036]

## IHRDC — IRB

Kipeperushi hiki kimetolewa na kitengo cha IRB (Institutional Review Board) ambacho ni sehemu ya Kituo cha Utafiti wa Maendeleo ya afya Ifakara (IHRDC), taasisi ambayo imekuwa ikifanya tafiti za afya nchini Tanzania tangu 1957

IRB ni chombo kinachosimamia maadili ya tafiti zinazofanywa chini ya usimamizi wa Kituo. Chombo hiki kinalo jukumu la kupitia nyaraka za tafiti zinazotarajwa kufanywa na Wanasayansi wa ndani au wa nje wakishirikiana na Kituo na kutoa kibali cha kufanyika kwa tafiti hizo,

Lengo kuu la IRB ni kulinda usalama na utu wa washiriki wa tafiti za afya katika jamii husika. Hii ni kuhakikisha kwamba tafiti zinazofanywa ndani ya Kituo ni salama na hazidhalilishi wala kudhuru washiriki.

---

Elewa kama kuna madhara ya utafiti na ni mikakati gani imewekwa kuepusha au kupunguza madhara hayo. Na utasaidiwaje endapo madhara hayo yakitokea

---

Mshiriki wa tafiti za Afya  
huchangia maendeleo ya afya ya  
jamii ya leo na ijayo

Tafiti za Afya ni lazima ziwe salama  
na zenye kulinda hadhi ya mshiriki  
na jamii kwa ujumla

**IFAKARA HEALTH RESEARCH &  
DEVPT CENTRE (IHRDC)  
MIKOCHENI OFFICE, PLOT 463,  
KIKO AVE  
P O BOX 78373  
DAR ES SALAAM  
Phone: + 255 22 2774756**

## MAADILI YA TAFITI ZA AFYA ZINAZOSHIRIKISHA BINADAMU

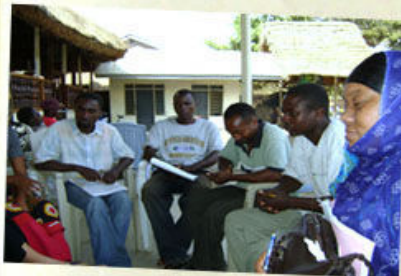

**IRC**

IFAKARA HEALTH RESEARCH  
& DEVELOPMENT CENTRE

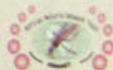

AFRICA MALARIA NETWORK
